# Supplementary material
Source: publisher figshare collection journal article supplement (https://gsajournals.figshare.com/ndownloader/files/27965703)
Supplement: Supplementary file 1 [file 27965703]

## Sheet: Summary
Table S4. Analysis of differentially located ISs on P. aeruginosa strains.
Query	Assembly Accession Number	Reference	ANIb	dDDH	TP	TP-ALL	TP*	FP	FP-ALL	C	R	D and NF	N Contigs	Is_Closed	Precision	Precision_VD
AR441	ASM307369v1	PAO1 (NC_002516.2)	93.7958	77.9	3	6	3	0	36	5	0	31	4	True	1	0.142857
CMC-115	NZ_CP046602.1	PAO1 (NC_002516.2)	97.4378	92.6	9	10	1	0	14	1	0	13	1	True	1	0.416667
AR_0446	NZ_CP029660.1	PAO1 (NC_002516.2)	98.0501	92.4	4	7	3	0	26	3	0	23	1	True	1	0.212121
VRFPA04	NZ_CP008739.1	PAO1 (NC_002516.2)	98.505	89.9	4	5	1	0	19	1	0	18	1	True	1	0.208333
PA_154197	NZ_CP014866.1	PAO1 (NC_002516.2)	98.971	95.1	4	6	2	0	12	2	0	10	1	True	1	0.333333
CDN129	NZ_CP056774.1	PAO1 (NC_002516.2)	99.2094	91.5	6	8	2	0	21	1	0	20	1	True	1	0.275862
LYT4	ASM1297170v1	PAO1 (NC_002516.2)	99.3794	100	6	7	1	0	17	3	0	14	2	True	1	0.291667
W16407	NZ_CP008869.2	PAO1 (NC_002516.2)	99.4961	94.6	6	8	2	0	10	0	0	10	1	True	1	0.444444
AR_PAO1161	NZ_CP032126.1	PAO1 (NC_002516.2)	99.9942	99.7	0	0	0	0	3	0	0	3	1	True	NA	NA
Average TP	4.66667	Max	9											AVG P	1	0.290661
Average TP.ALL	6.33333	Max.All	10

## Sheet: ANI & dDDH
Strain	Accession Number	Assembly	ANIb	DDH_1	DDH_2	DDH_3
PAO1161	NZ_CP032126.1	Complete genome	99.9942	100	99.7	99.9		DDH_1 = (identities / HSP length)
W16407	NZ_CP008869.2	Complete genome	99.4961	96.8	94.6	96.6		DDH_2 = (HSP length / total length)
LYT4	ASM1297170v1	Scaffolds/Contigs	99.3794	100	100	100		DDH_3 = (identities / total length)
CDN129	NZ_CP056774.1	Complete genome	99.2094	94.4	91.5	94.2
PA_154197	NZ_CP014866.1	Complete genome	98.971	92.3	95.1	96.5
VRFPA04	NZ_CP008739.1	Complete genome	98.505	89.8	89.9	92.4
AR_0446	NZ_CP029660.1	Complete genome	98.0501	84.3	92.4	93.6
CMC-115	NZ_CP046602.1	Complete genome	97.4378	78.2	92.6	92.8
AR441	ASM307369v1	Scaffolds/Contigs	93.7958	51.8	77.9	74.5
